# Supplementary material
Source: HighWire-hosted journal article supplement (https://erj.ersjournals.com/content/49/6/1602409)
Supplement: inline-supplementary-material-1 [file inline-supplementary-material-1.pdf]

**Table S1 Measurements at baseline and 24 weeks after the final BPA and changes from baseline in the two participating centres**

| Variable (mean $\pm$ SD unless indicated otherwise) | Baseline Hannover                       | Week 24 Hannover                         | Change from baseline, Hannover | Baseline Bad Nauheim                    | Week 24 Bad Nauheim                      | Change from baseline, Bad Nauheim |
|-----------------------------------------------------|-----------------------------------------|------------------------------------------|--------------------------------|-----------------------------------------|------------------------------------------|-----------------------------------|
| LTOT n (%)                                          | 5 (16)                                  | 5 (16)                                   | 0                              | 6 (24)                                  | 5 (20)                                   | -1                                |
| <b>Exercise capacity</b>                            |                                         |                                          |                                |                                         |                                          |                                   |
| WHO functional classes I-IV, n (%)                  | 0 (0%)<br>7 (23%)<br>24 (77%)<br>0 (0%) | 1 (3%)<br>18 (58%)<br>12 (39%)<br>0 (0%) | -                              | 0 (0%)<br>2 (8%)<br>16 (64%)<br>7 (28%) | 5 (20%)<br>15 (60%)<br>4 (16%)<br>0 (0%) | -                                 |
| 6 min walking distance (m)                          | 355 $\pm$ 112                           | 391 $\pm$ 116                            | 36                             | 363 $\pm$ 104                           | 394 $\pm$ 96                             | 31                                |
| Borg dyspnoea scale (1-10)                          | 5.0 $\pm$ 2.1                           | 3.5 $\pm$ 2.0                            | -1.45                          | 4.3 $\pm$ 1.9                           | 2.4 $\pm$ 1.9                            | -1,9                              |
| <b>Haemodynamics and NT-proBNP</b>                  |                                         |                                          |                                |                                         |                                          |                                   |
| Right atrial pressure (mmHg)                        | 9 $\pm$ 6                               | 6 $\pm$ 4                                | -3                             | 7 $\pm$ 4                               | 6 $\pm$ 3                                | -1                                |
| PAPm (mmHg)                                         | 42 $\pm$ 12                             | 35 $\pm$ 11                              | -7                             | 37 $\pm$ 11                             | 30 $\pm$ 10                              | -7                                |
| PAPsyst (mmHg)                                      | 68 $\pm$ 21                             | 57 $\pm$ 20                              | -11                            | 63 $\pm$ 20                             | 52 $\pm$ 18                              | -11                               |
| PAPdiast (mmHg)                                     | 26 $\pm$ 9                              | 22 $\pm$ 8                               | -4                             | 20 $\pm$ 8                              | 15 $\pm$ 6                               | -5                                |
| PAWP (mmHg)                                         | 9 $\pm$ 3                               | 10 $\pm$ 3                               | 1                              | 10 $\pm$ 3                              | 9 $\pm$ 3                                | -1                                |

|                                                          |                    |                   |      |                    |                   |      |
|----------------------------------------------------------|--------------------|-------------------|------|--------------------|-------------------|------|
| DPG (mmHg)                                               | 17 ± 8             | 13 ± 8            | -4   | 10 ± 7             | 6 ± 6             | -4   |
| TPG (mmHg)                                               | 33 ± 11            | 26 ± 11           | -7   | 26 ± 11            | 21 ± 10           | -5   |
| CO (L/min)                                               | 4.4 ± 1.1          | 4.7 ± 1.3         | 0.3  | 4.3 ± 1.1          | 4.6 ± 1.2         | 0.3  |
| CI (L/min/m <sup>2</sup> )                               | 2.4 ± 0.6          | 2.5 ± 0.6         | 0.1  | 2.4 ± 0.6          | 2.4 ± 0.6         | 0    |
| PVR (dyn·s·cm <sup>-5</sup> )                            | 658 ± 302          | 491 ± 331         | -167 | 508 ± 248          | 373 ± 178         | -135 |
| SvO <sub>2</sub> (%)                                     | 65 ± 8             | 67 ± 7            | 3    | 63 ± 9             | 70 ± 4            | 7    |
| HR (bpm)                                                 | 70 ± 10            | 69 ± 11           | -1   | 74 ± 15            | 70 ± 12           | -4   |
| NT-proBNP<br>(median, IQR)                               | 464 (255-<br>1665) | 265 (124-<br>967) | -199 | 543 (184-<br>1658) | 216 (106-<br>514) | -327 |
| <b>Echocardiographic<br/>findings</b>                    |                    |                   |      |                    |                   |      |
| RVED diameter<br>(mm)                                    | 37 ± 8             | 35 ± 7            | -2   | 40 ± 9             | 34 ± 9            | -6   |
| RV free wall<br>diameter (mm)                            | 6.6 ± 1.2          | 6.5 ± 1.0         | -0.1 | n/a                | n/a               | n/a  |
| TAPSE (mm)                                               | 19 ± 5             | 22 ± 5            | 3    | 19 ± 5             | 21 ± 5            | 2    |
| RA-Dilation (% of<br>patients)                           | 74                 | 48                | -26  | 79                 | 22                | -57  |
| <b>Blood gas analysis<br/>and pulmonary<br/>function</b> |                    |                   |      |                    |                   |      |
| PaO <sub>2</sub> (mmHg)                                  | 61 ± 8             | 64 ± 10           | 3    | 63 ± 10            | 69 ± 9            | 6    |
| SaO <sub>2</sub> (%)                                     | 94 ± 3             | 94 ± 3            | 0    | 93 ± 3             | 95 ± 2            | 2    |
| PaCO <sub>2</sub> (mmHg)                                 | 34 ± 3             | 35 ± 4            | 1    | 33 ± 4             | 32 ± 8            | -1   |
| DLCO (% pred)                                            | 58 ± 18            | 63 ± 18           | 5    | 55 ± 15            | 55 ± 19           | 0    |
| <b>Renal Function</b>                                    |                    |                   |      |                    |                   |      |

|                                     |             |             |    |             |             |   |
|-------------------------------------|-------------|-------------|----|-------------|-------------|---|
| Creatinine<br>( $\mu\text{mol/l}$ ) | $90 \pm 27$ | $91 \pm 29$ | 1  | $83 \pm 45$ | $83 \pm 22$ | 0 |
| eGFR (ml/min)                       | $56 \pm 7$  | $55 \pm 8$  | -1 | $70 \pm 18$ | $75 \pm 19$ | 5 |

Values are given as mean  $\pm$  SD unless indicated otherwise

Abbreviations: WHO, World Health Organization; PAPm, mean pulmonary artery pressure; PAPsyst, systolic pulmonary artery pressure; PAPdiast, diastolic pulmonary artery pressure; PAWP, pulmonary arterial wedge pressure; DPG, diastolic pressure gradient; TPG, transpulmonary gradient; CO, cardiac output; CI, cardiac index; PVR, pulmonary vascular resistance; SvO<sub>2</sub>, mixed venous oxygen saturation; HR, heart rate; NT-proBNP, N-terminal fragment of pro-brain natriuretic peptide; RVED, right ventricular enddiastolic diameter; RV, right ventricle; TAPSE, tricuspid annular plane systolic excursion; RA, right atrium; DLCO, lung diffusion capacity for carbon monoxide; eGFR, estimated glomerular filtration rate based on serum creatinine
